# Supplementary material for: Biointerfaces with ultrathin patterns for directional control of cell migration
Source: PubMed Central journal article supplement (PMC11000378; doi:10.1186/s12951-024-02418-3), 2024-04-08
Supplement: 12951_2024_2418_MOESM1_ESM.pdf [file 12951_2024_2418_MOESM1_ESM.pdf]

*Electronic Supplementary Information (ESI)*

# **Biointerfaces with Ultrathin Patterns for Directional Control of Cell Migration**

*Yijun Cheng<sup>1,2</sup> and Stella W. Pang<sup>1,2\*</sup>*

<sup>1</sup>Department of Electrical Engineering, City University of Hong Kong, Kowloon, Hong Kong,  
China

<sup>2</sup>Centre for Biosystems, Neuroscience, and Nanotechnology, City University of Hong Kong,  
Kowloon, Hong Kong, China

\*Corresponding Author: pang@cityu.edu.hk

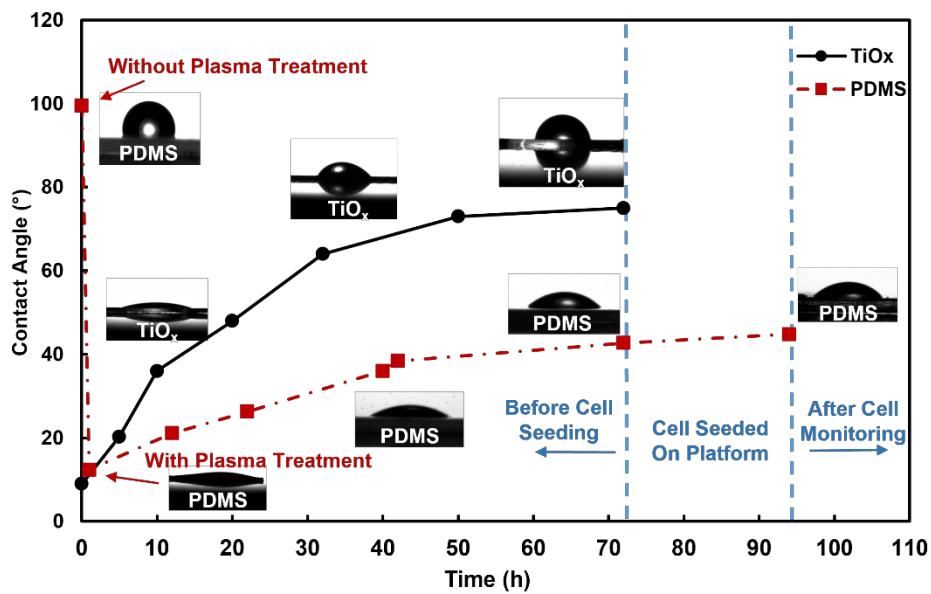

**Supplementary Figure S1.** Measurements of changes in contact angles for different surfaces over time.

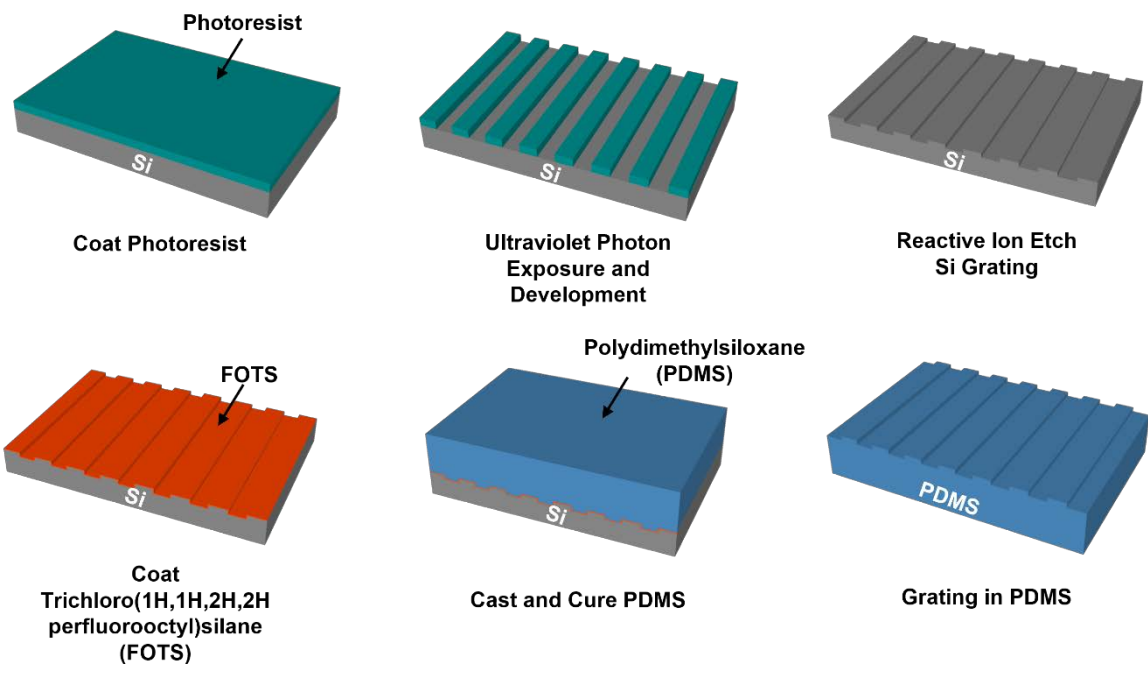

**Supplementary Figure S2. Schematics of fabrication technology for PDMS grating.**

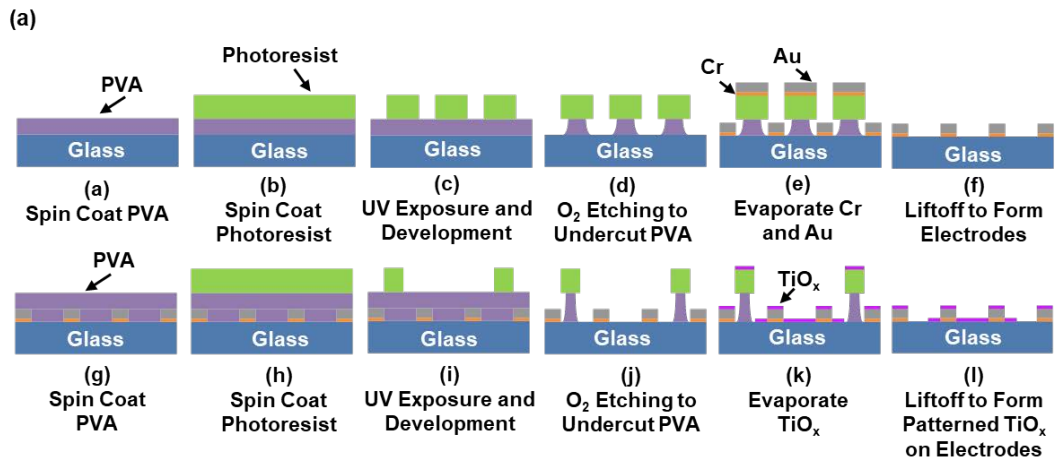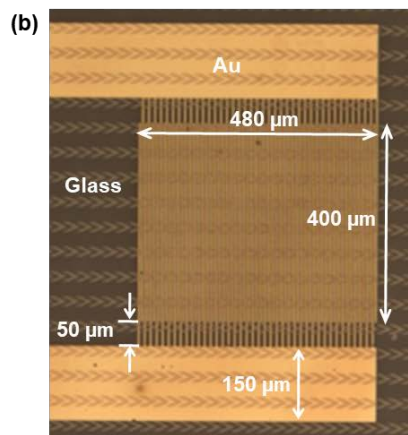

**Supplementary Figure S3.** (a) Schematics of fabrication technology and (b) optical micrograph for interdigital microelectrode integrated with patterned TiO<sub>x</sub>.

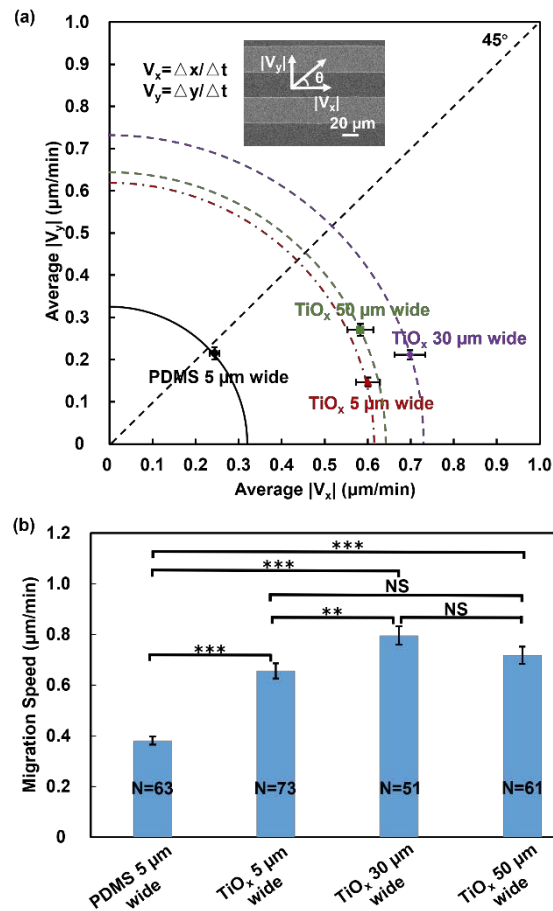

**Supplementary Figure S4.** (a) Migration directionality of MC3T3-E1 cells on PDMS gratings with 10 nm height and 5  $\mu\text{m}$  width; and on patterned  $\text{TiO}_x$  in grating shape with 5, 30, and 50  $\mu\text{m}$  widths. All gratings were oriented along x-direction as shown in inset. (b) MC3T3-E1 cell migration speed on PDMS with 10 nm height and 5  $\mu\text{m}$  width; and on patterned  $\text{TiO}_x$  in grating shape with 5, 30, and 50  $\mu\text{m}$  widths. Statistical analysis was performed using one-way ANOVA followed by Tukey's post hoc test, with \*\*p < 0.01, \*\*\*p < 0.001, and NS – not significant.

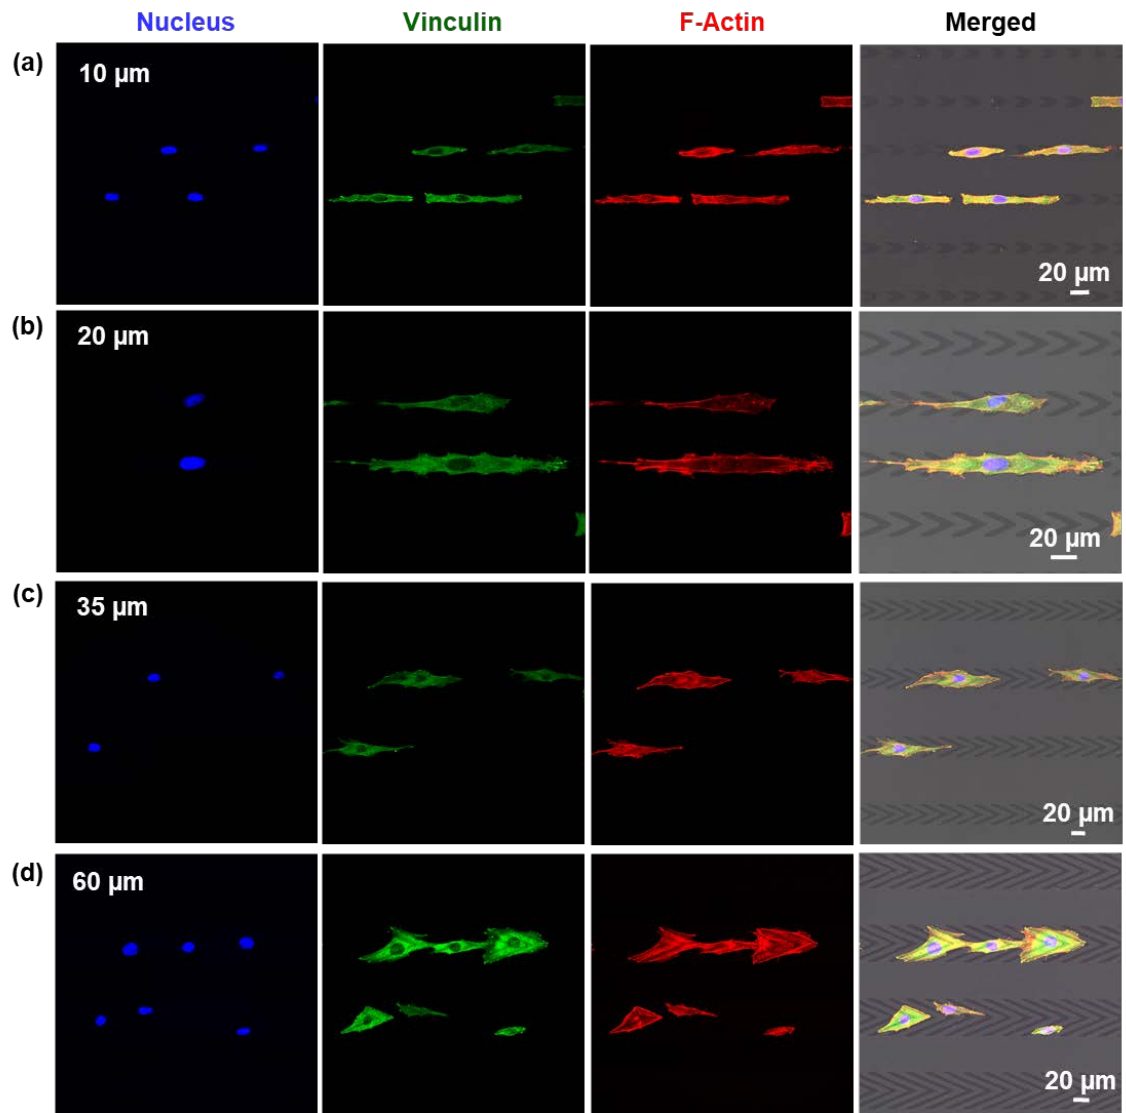

**Supplementary Figure S5.** Immunofluorescence images of MC3T3-E1 cells cultured on patterned  $\text{TiO}_x$  in arrowhead shape with arm lengths of (a) 10, (b) 20, (c) 35, and (d) 60  $\mu\text{m}$ . (Blue: nucleus, Green: vinculin, and Red: filament actin).
